# Supplementary material for: Neonatal anesthesia exposure impacts brain microRNAs and their associated neurodevelopmental processes
Source: PubMed Central journal article supplement (PMC6045579; doi:10.1038/s41598-018-28874-0), 2018-07-13
Supplement: 41598_2018_28874_MOESM1_ESM.pdf [file 41598_2018_28874_MOESM1_ESM.pdf]

## Supplementary Information

### Neonatal anesthesia exposure impacts brain microRNAs and their associated neurodevelopmental processes

Daisy Lin<sup>1,2\*</sup>, Jinyang Liu<sup>1</sup>, Zihua Hu<sup>3</sup>, James Cottrell<sup>1</sup>  
and Ira S. Kass<sup>1,2</sup>

Anesthesiology Department<sup>1</sup>, The Robert F. Furchgott Center for Neural and Behavioral Sciences, Department of Physiology and Pharmacology<sup>2</sup>, SUNY Downstate Medical Center, and Center for Computational Research, New York State Center of Excellence in Bioinformatics & Life Sciences<sup>3</sup>, SUNY Buffalo.

Daisy Lin\*  
Anesthesiology Department  
SUNY Downstate Medical Center, Box 6  
450 Clarkson Ave.  
Brooklyn, NY 11203  
Email: daisy.lin@downstate.edu  
Phone: 718-270-2048, 718-270-1709

Supplementary

Figure 1.

(A)

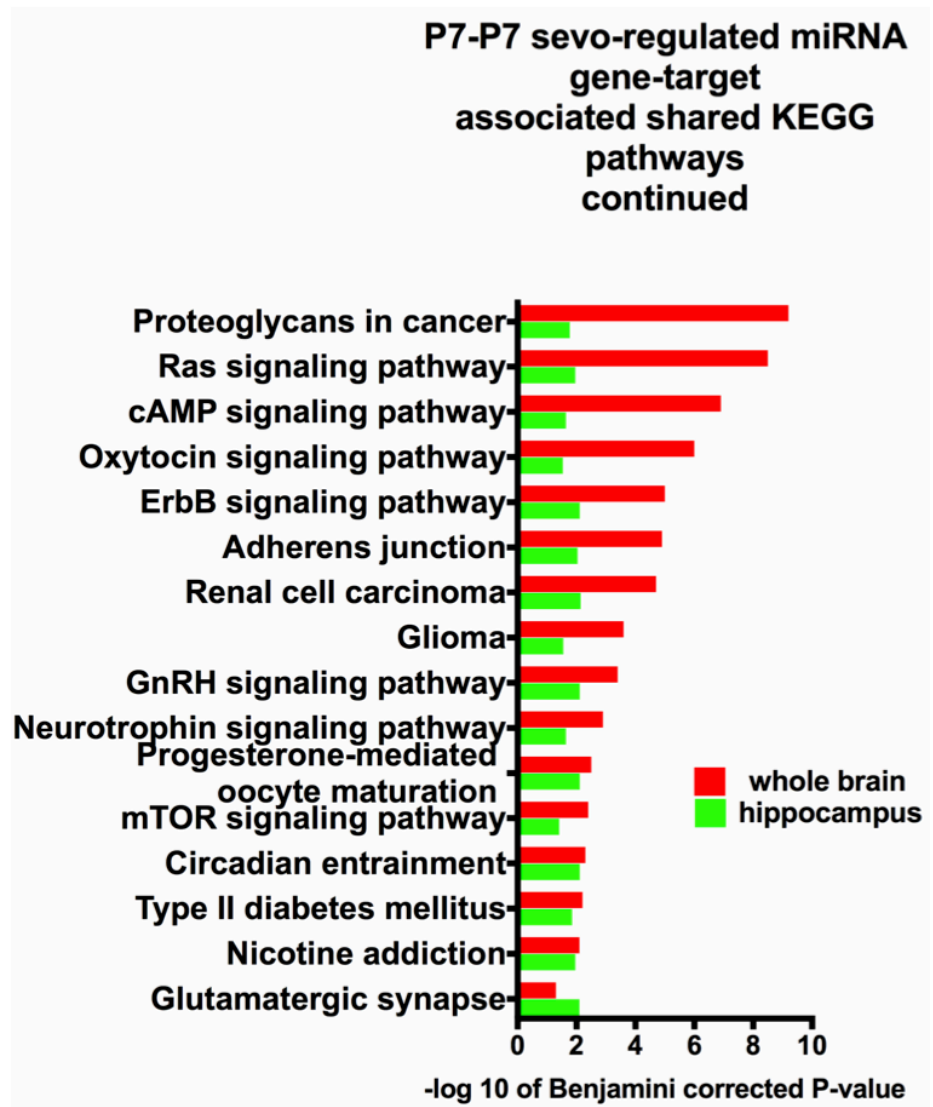

**Supplementary  
Figure 1.**

**(B)** P7-P7 sevo-regulated miRNA gene-target associated KEGG pathways whole brain specific, continued 1

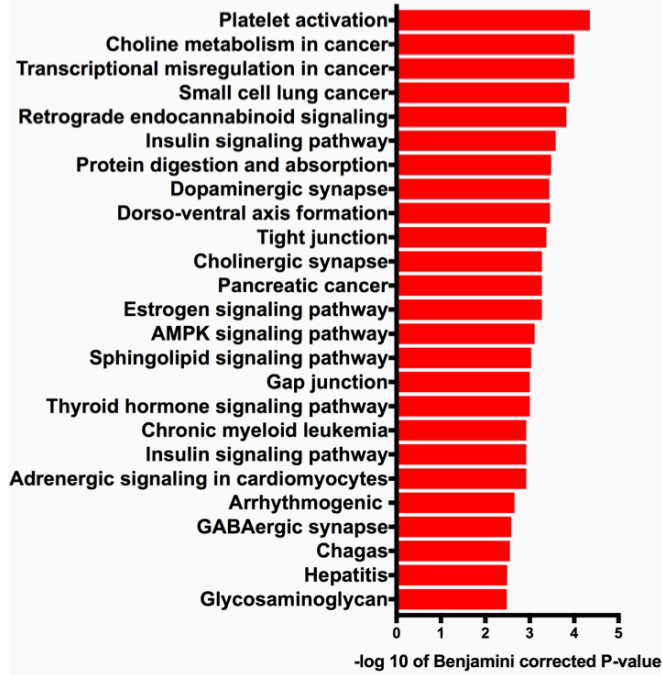

**(C)** P7-P7 sevo-regulated miRNA gene-target associated KEGG pathways whole brain specific, continued 2

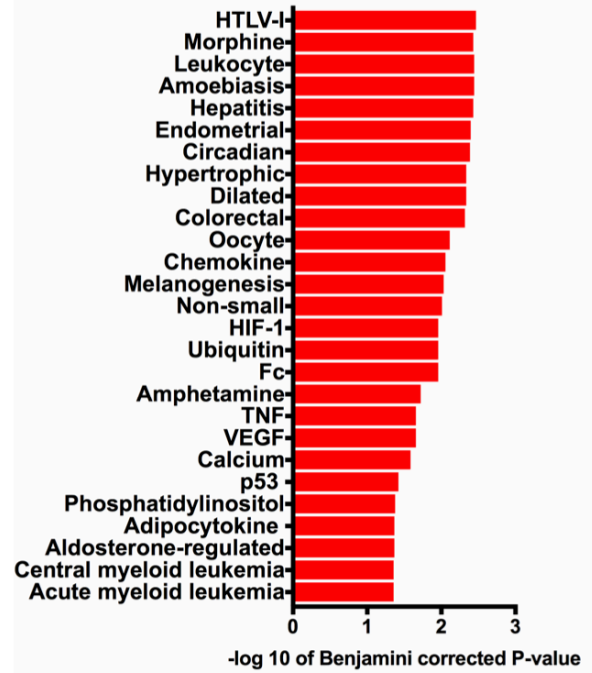

**Supplementary Figure 1  
(D)**

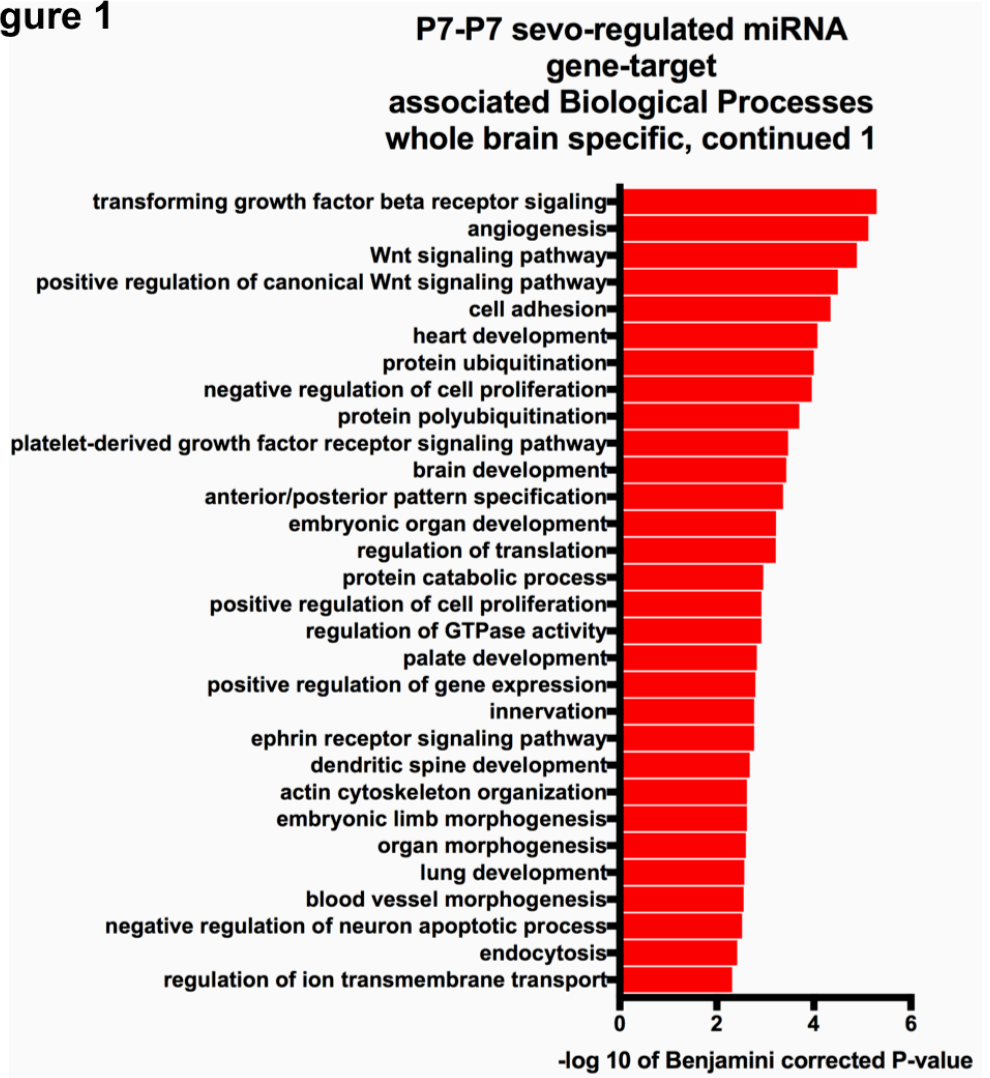

**Supplementary Figure 1.  
(E)**

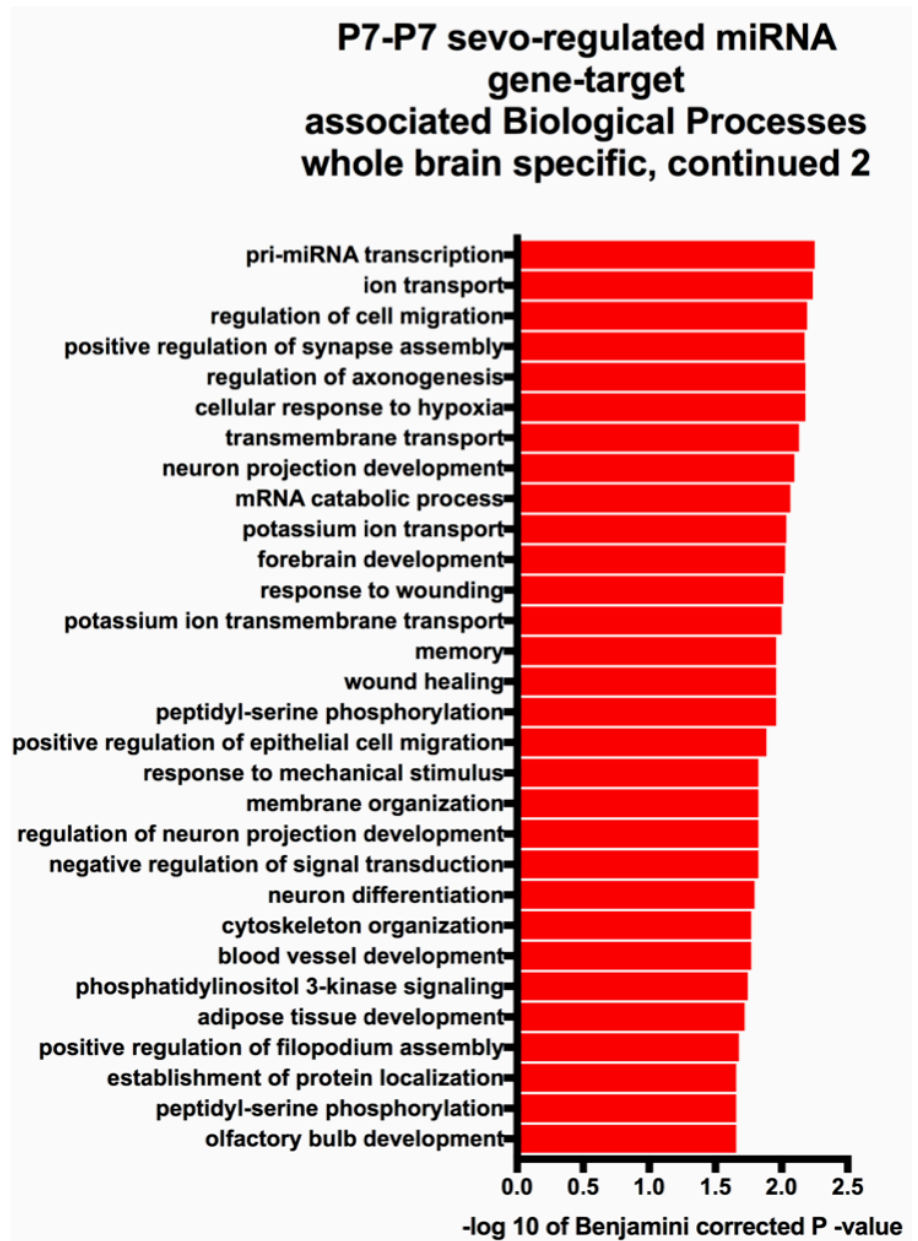

**Supplementary Figure 1.  
(F)**

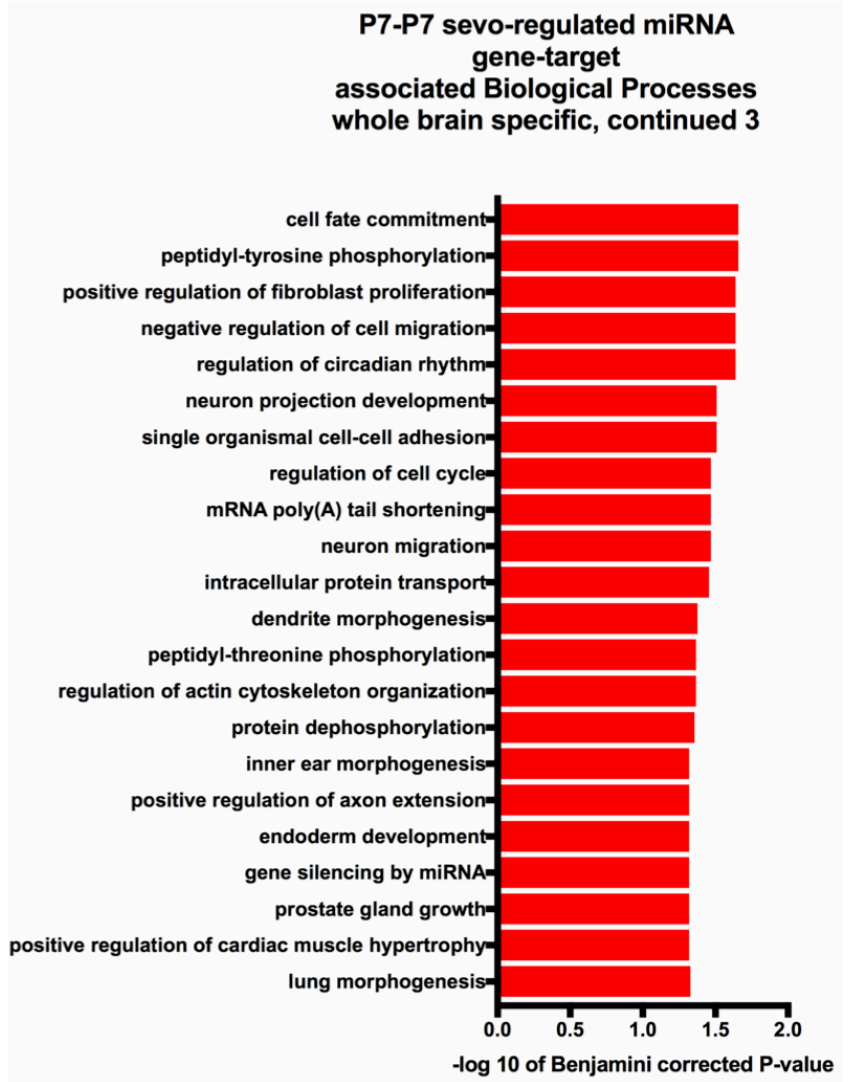

**Supplementary Figure 2.**  
**(A)**

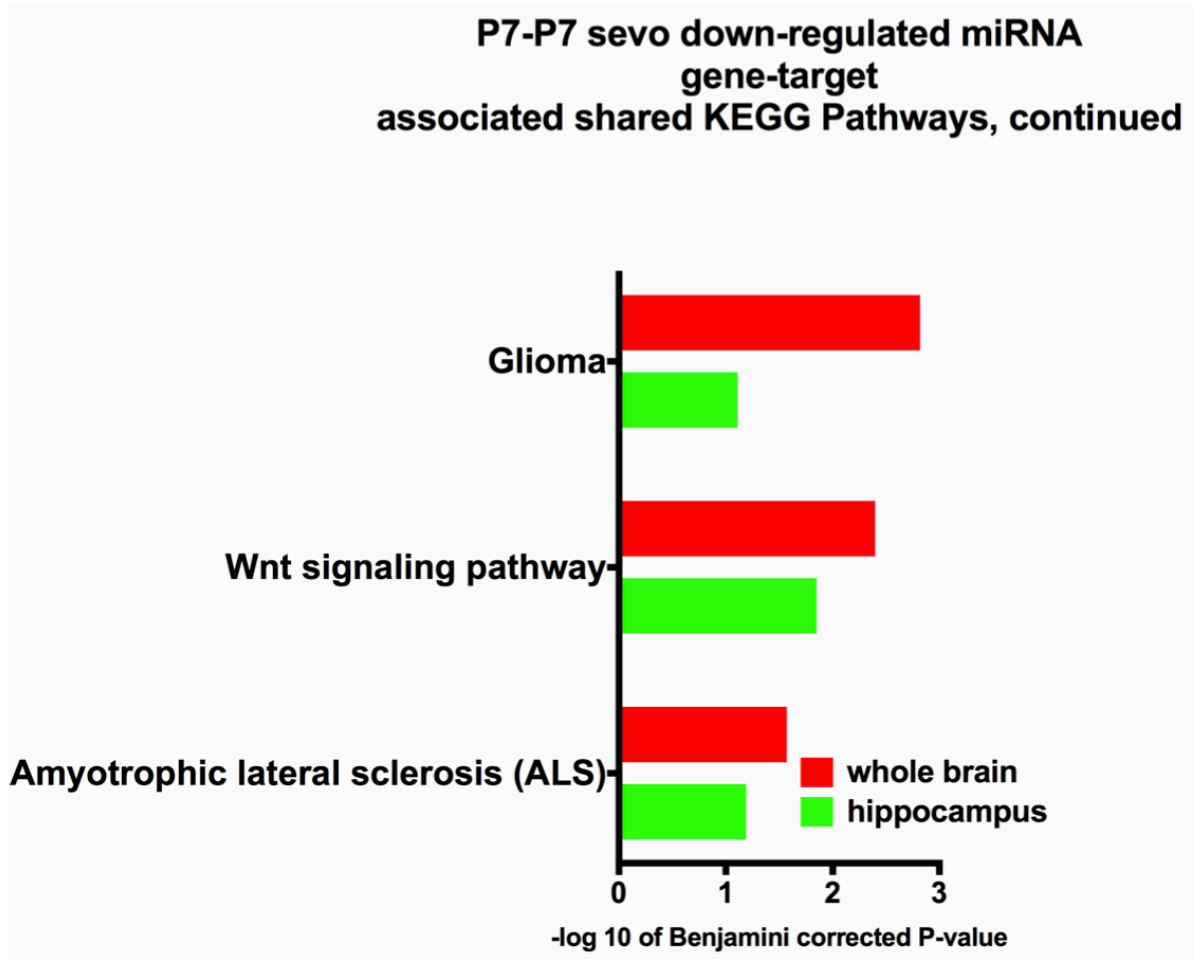

Supplementary Figure 2.

(B)

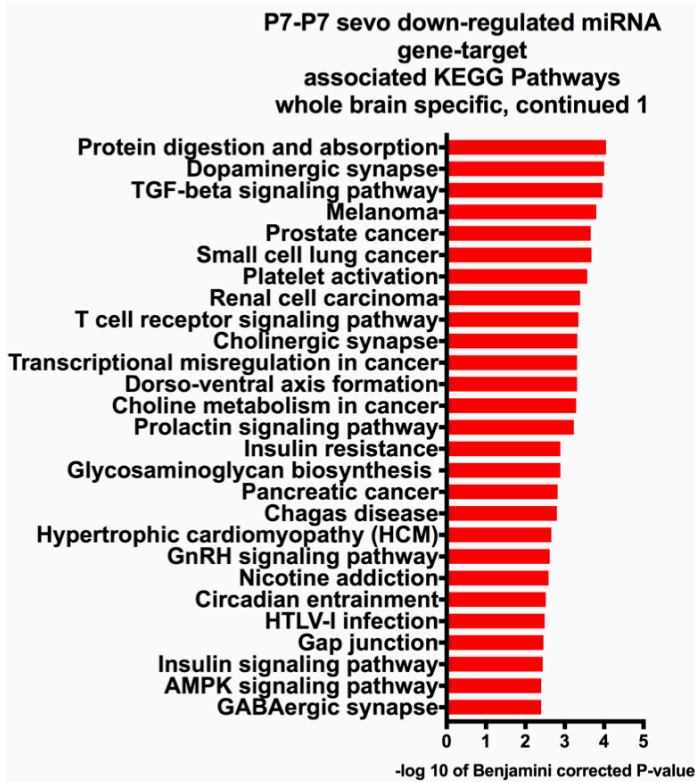

(C)

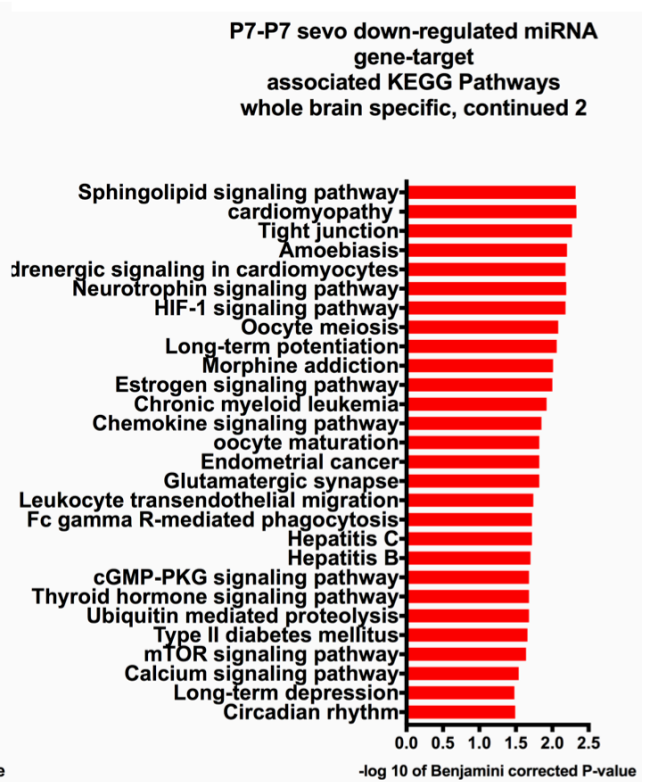

Supplementary Figure 2.

(D)

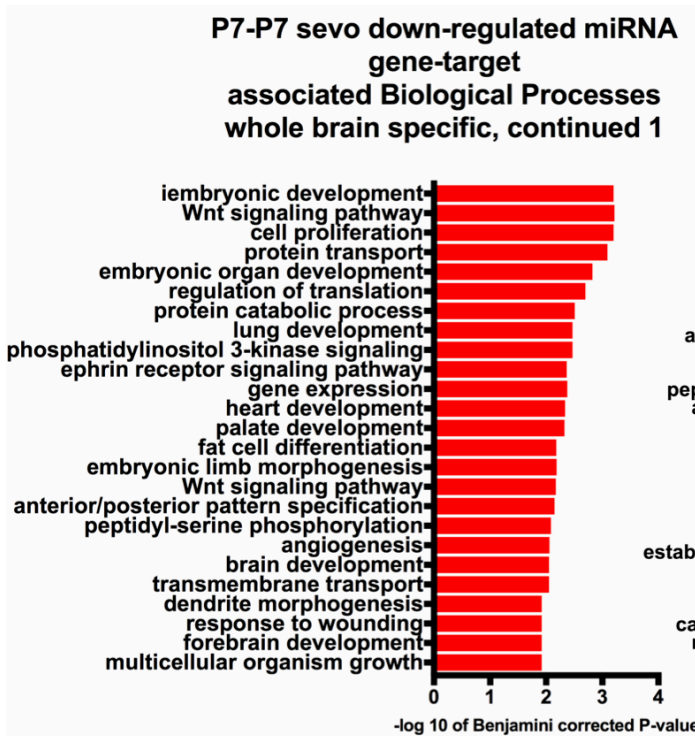

(E)

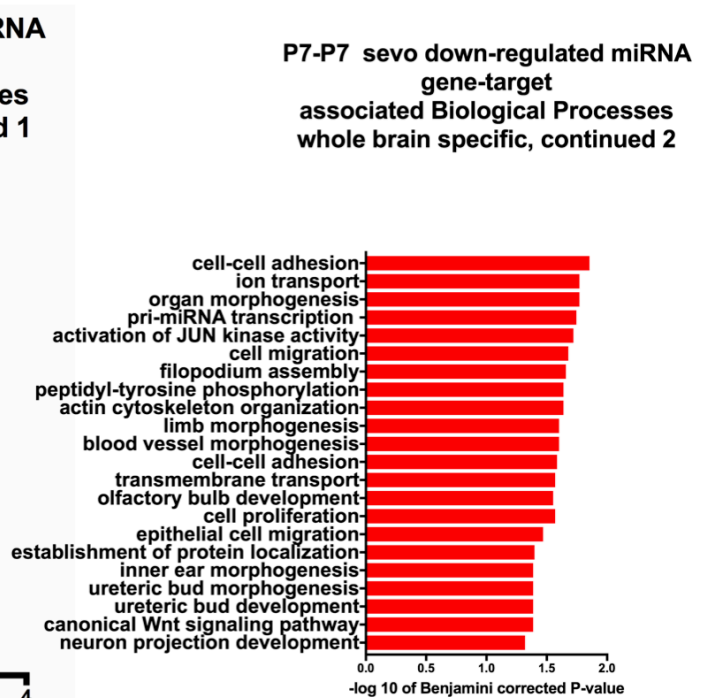



Supplementary Figure 3.  
(A)

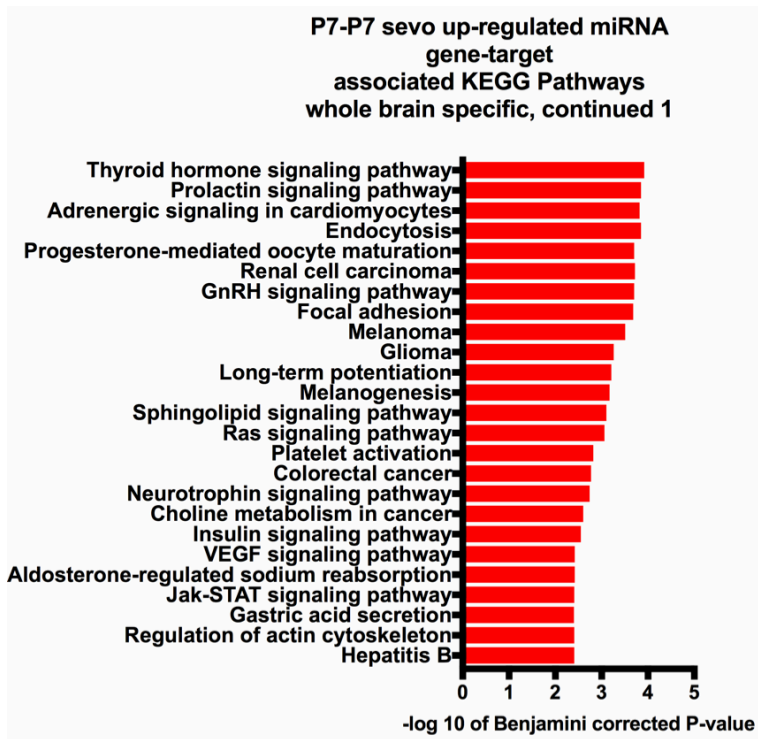

(B)

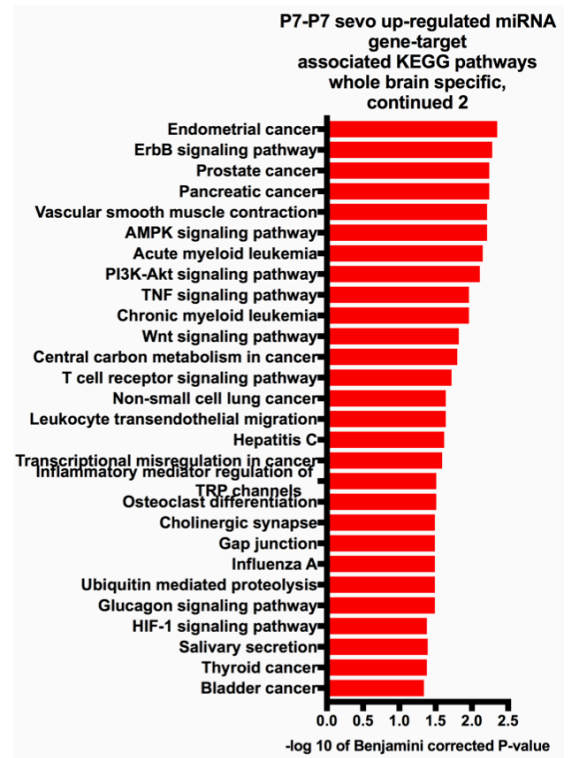

**Supplementary Figure 3.**  
**(C)**

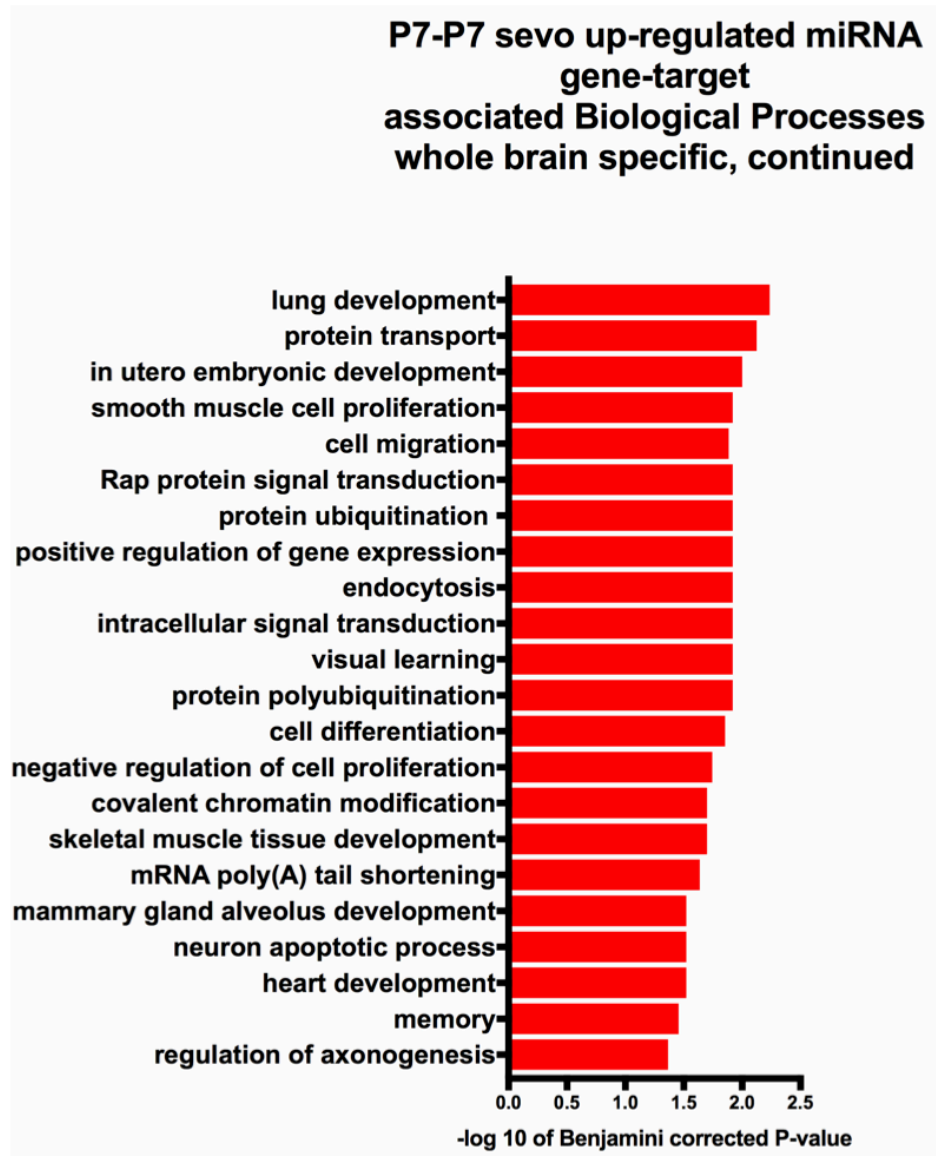

Supplementary Figure 4.

(A)

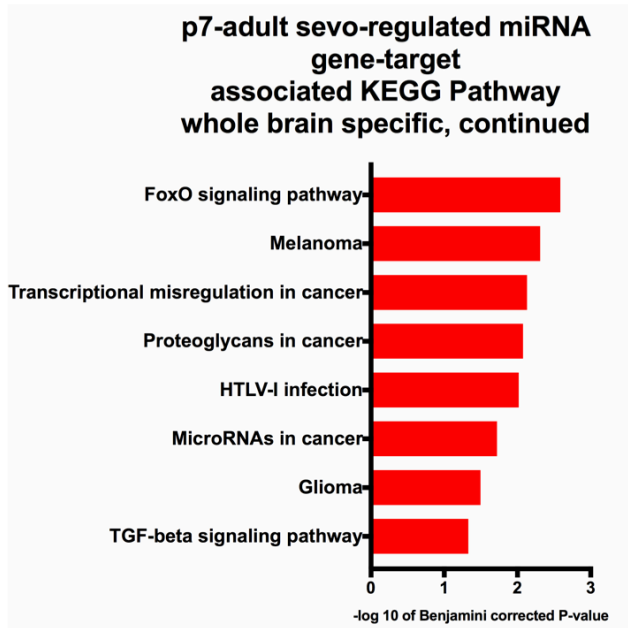

(B)

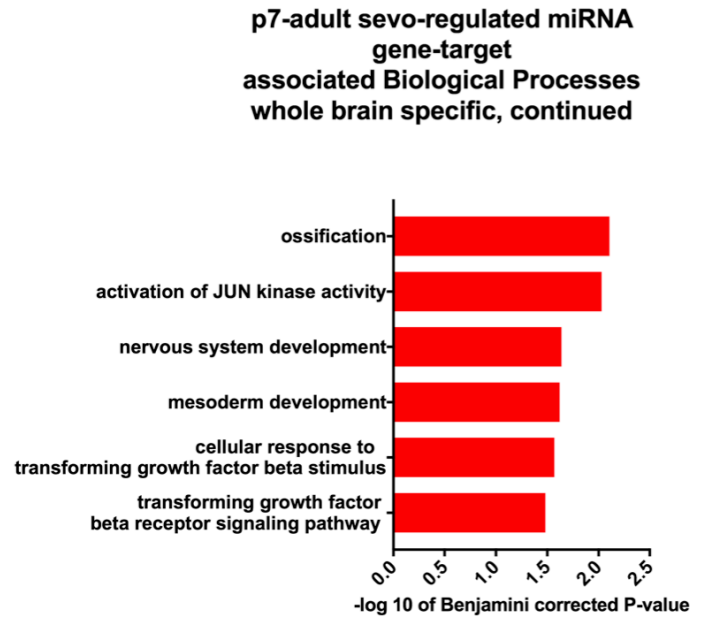

**Supplementary Figure 5.****(A) Whole brain:**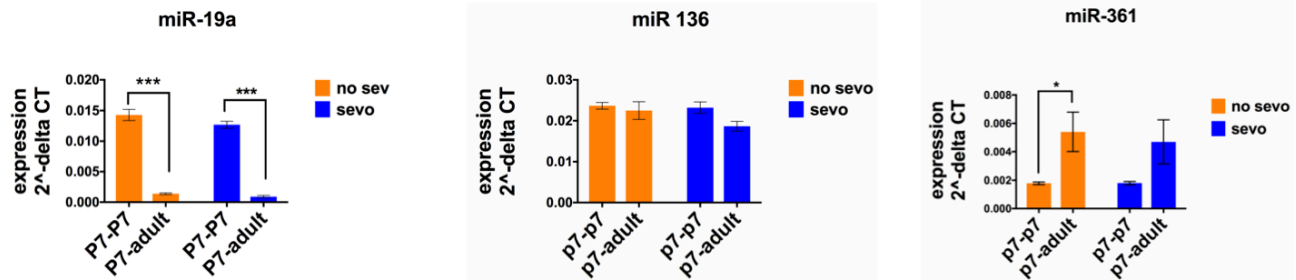**(B) Hippocampus:**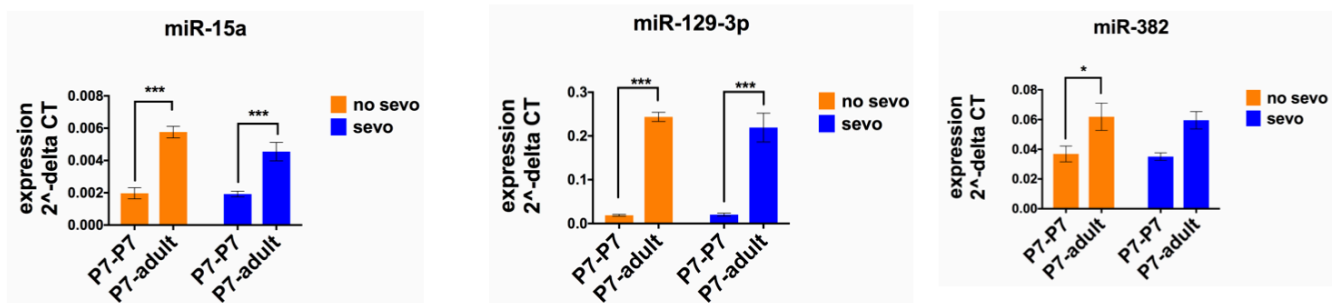**Supplementary Figures:**

**1) P7-P7 sevo-regulated miRNA gene-target associated KEGG pathways and Biological processes, continued after the top ten pathways.** P7-P7 sevo-regulated miRNA (from Table 1, both up and down-regulated miRNAs) gene-targets have shared (A), whole brain specific (B, C, D and E) (Kegg pathways and biological processes). (Pathways shown are based on Benjamini corrected p-value of <math><0.05</math>).

**2) P7-P7 sevo down-regulated miRNA gene target associated KEGG pathway and biological process, continued after the top ten pathways.** P7-P7 sevo down-regulated miRNA gene- targets have shared (A), whole brain specific (B, C, D and E) Kegg pathways

and biological processes. (Pathways shown are based on Benjamini corrected p-value of <0.05).

**3) P7-P7 sevo up-regulated miRNA gene-target associated KEGG pathways and biological processes, continued after the top ten pathways.** P7-P7 sevo up-regulated whole brain specific (A, B and C) Kegg pathways and biological processes. (Pathways shown are based on Benjamini corrected p-value of <0.05).

**4) P7-adult sevo regulated miRNA gene-target associated KEGG pathways and biological processes, continued after the top ten pathways.** Sevo-regulated miRNA gene-targets have whole brain specific (A and B) Kegg pathways and biological processes. (Pathways shown are based on Benjamini corrected p-value of <0.05).

**5) P7 sevo treatment did not have long-lasting effect on the expression of the following miRNAs from Table 1.** miR-19a, 136 and 361 from the whole brain and miR-15a, 129-3p and 382 from the hippocampus are not differentially expressed in P7-adult comparing no sevo vs. sevo. Among these miRNAs however, some are shown to have significant fluctuation in expression as result of age (P7-P7 vs. P7-adult) (\* and \*\*\* denote  $P < 0.05$  and  $P < 0.0001$ , respectively).
